# Supplementary material for: Enhanced exon skipping and prolonged dystrophin restoration achieved by TfR1-targeted delivery of antisense oligonucleotide using FORCE conjugation in mdx mice
Source: PubMed Central journal article supplement — Nucleic Acids Res. 2022 Aug 10;50(20):11401–14. doi: 10.1093/nar/gkac641 (PMC9723632; doi:10.1093/nar/gkac641), 2022-08-10
Supplement: gkac641_supplemental_file.pdf [file gkac641_supplemental_file.pdf]

# Supplemental figures and figure legends

A

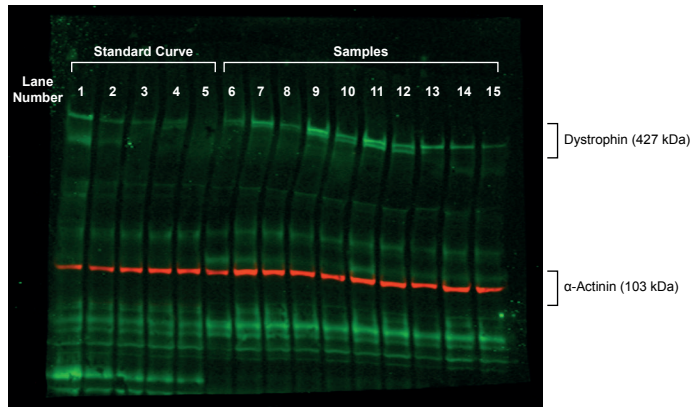

B

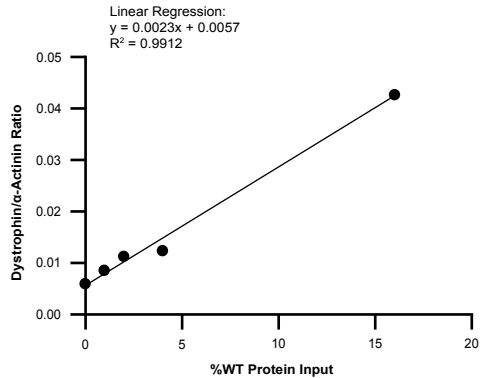

C

## Gel 1

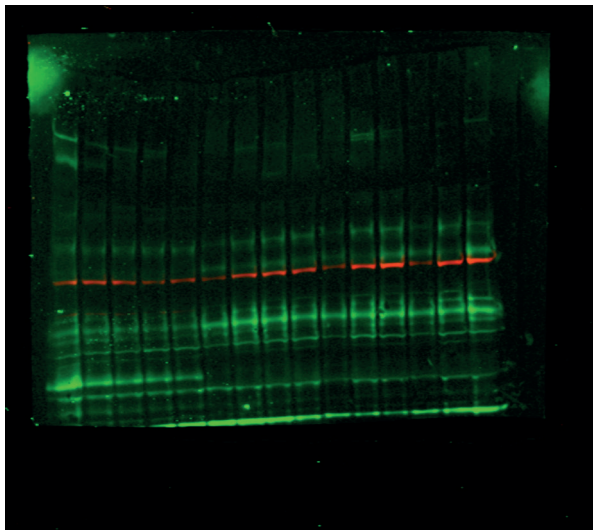

| Lane Number | Mouse ID | Tissue     |
|-------------|----------|------------|
| 1           | 16% WT   | Standard   |
| 2           | 4% WT    | Standard   |
| 3           | 2% WT    | Standard   |
| 4           | 1% WT    | Standard   |
| 5           | 0% WT    | Standard   |
| 6           | 1        | Quadriceps |
| 7           | 2        | Quadriceps |
| 8           | 3        | Quadriceps |
| 9           | 4        | Quadriceps |
| 10          | 5        | Quadriceps |
| 11          | 31       | Quadriceps |
| 12          | 32       | Quadriceps |
| 13          | 33       | Quadriceps |
| 14          | 34       | Quadriceps |
| 15          | 35       | Quadriceps |

## Gel 2

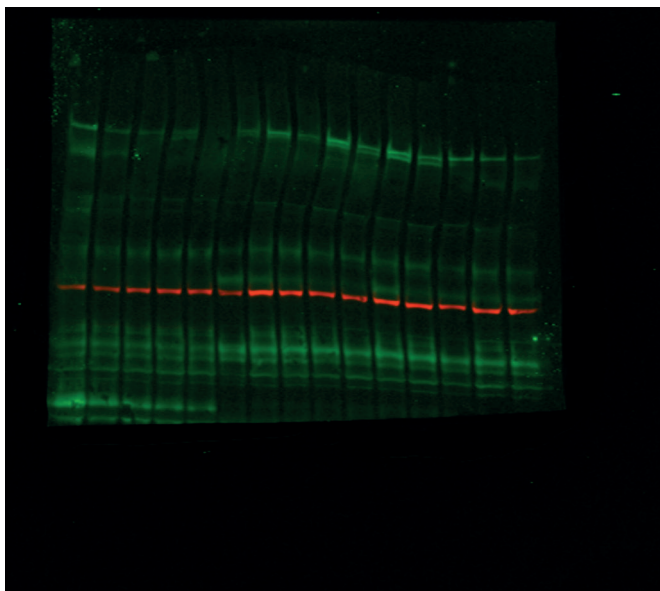

| Lane Number | Mouse ID | Tissue     |
|-------------|----------|------------|
| 1           | 16% WT   | Standard   |
| 2           | 4% WT    | Standard   |
| 3           | 2% WT    | Standard   |
| 4           | 1% WT    | Standard   |
| 5           | 0% WT    | Standard   |
| 6           | 36       | Quadriceps |
| 7           | 37       | Quadriceps |
| 8           | 38       | Quadriceps |
| 9           | 39       | Quadriceps |
| 10          | 40       | Quadriceps |
| 11          | N/A      | N/A        |
| 12          | 7        | Quadriceps |
| 13          | N/A      | N/A        |
| 14          | N/A      | N/A        |
| 15          | N/A      | N/A        |

### Gel 3

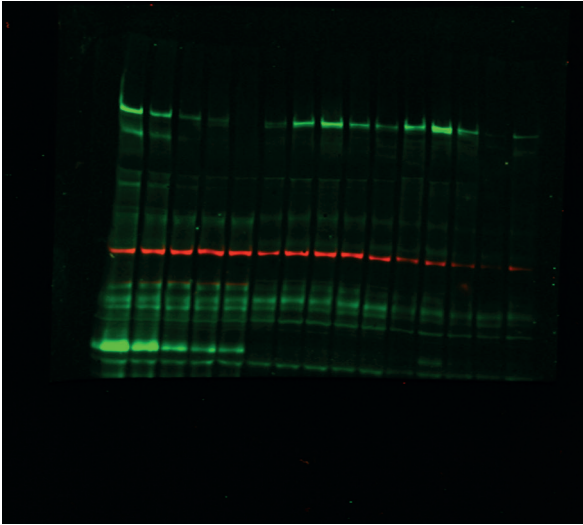

| Lane Number | Mouse ID | Tissue     |
|-------------|----------|------------|
| 1           | 32% WT   | Standard   |
| 2           | 16% WT   | Standard   |
| 3           | 4% WT    | Standard   |
| 4           | 1% WT    | Standard   |
| 5           | 0% WT    | Standard   |
| 6           | 41       | Quadriceps |
| 7           | 42       | Quadriceps |
| 8           | 43       | Quadriceps |
| 9           | 44       | Quadriceps |
| 10          | 45       | Quadriceps |
| 11          | 11       | Quadriceps |
| 12          | 12       | Quadriceps |
| 13          | N/A      | N/A        |
| 14          | N/A      | N/A        |
| 15          | N/A      | N/A        |

### Gel 4

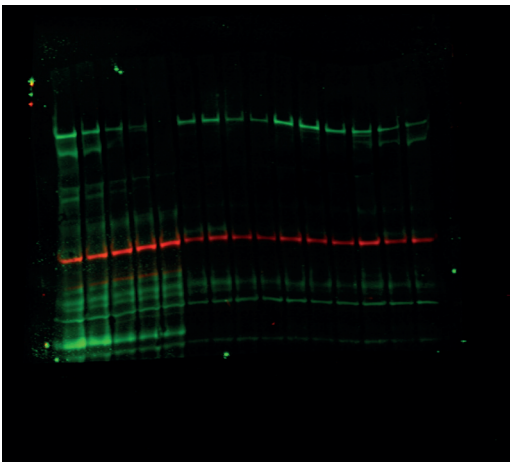

| Lane Number | Mouse ID | Tissue     |
|-------------|----------|------------|
| 1           | 32% WT   | Standard   |
| 2           | 16% WT   | Standard   |
| 3           | 4% WT    | Standard   |
| 4           | 1% WT    | Standard   |
| 5           | 0% WT    | Standard   |
| 6           | 46       | Quadriceps |
| 7           | 47       | Quadriceps |
| 8           | 48       | Quadriceps |
| 9           | 49       | Quadriceps |
| 10          | 50       | Quadriceps |
| 11          | 16       | Quadriceps |
| 12          | 17       | Quadriceps |
| 13          | N/A      | N/A        |
| 14          | N/A      | N/A        |
| 15          | N/A      | N/A        |

## Gel 5

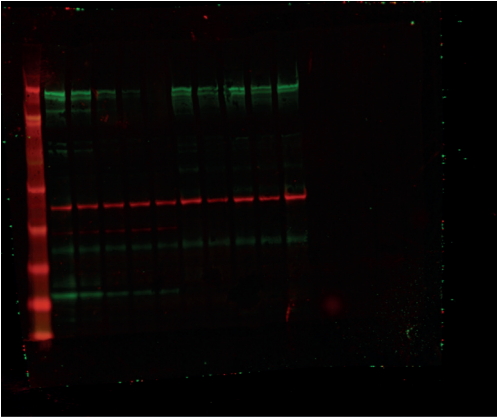

| Lane Number | Mouse ID | Tissue     |
|-------------|----------|------------|
| 1           | 32% WT   | Standard   |
| 2           | 16% WT   | Standard   |
| 3           | 4% WT    | Standard   |
| 4           | 1% WT    | Standard   |
| 5           | 0% WT    | Standard   |
| 6           | 21       | Quadriceps |
| 7           | 22       | Quadriceps |
| 8           | 23       | Quadriceps |
| 9           | 24       | Quadriceps |
| 10          | 25       | Quadriceps |
| 11          | N/A      | N/A        |
| 12          | N/A      | N/A        |
| 13          | N/A      | N/A        |
| 14          | N/A      | N/A        |
| 15          | N/A      | N/A        |

## Gel 6

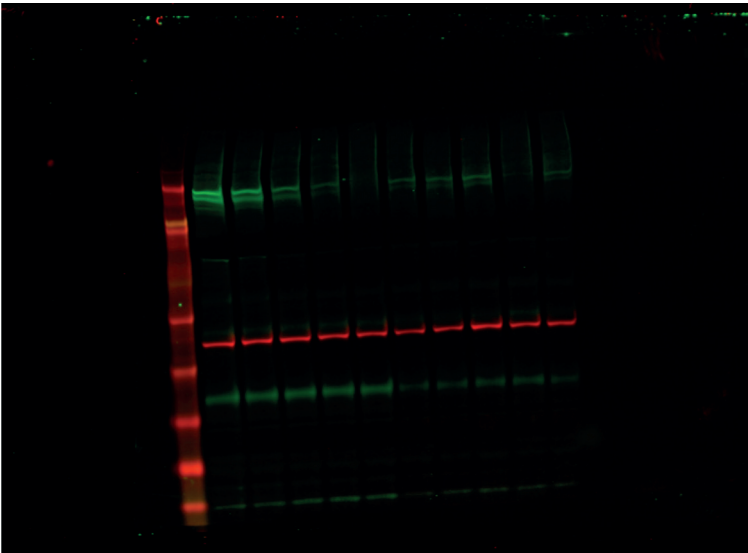

| Lane Number | Mouse ID | Tissue     |
|-------------|----------|------------|
| 1           | 32% WT   | Standard   |
| 2           | 16% WT   | Standard   |
| 3           | 4% WT    | Standard   |
| 4           | 1% WT    | Standard   |
| 5           | 0% WT    | Standard   |
| 6           | 26       | Quadriceps |
| 7           | 27       | Quadriceps |
| 8           | 28       | Quadriceps |
| 9           | 29       | Quadriceps |
| 10          | 30       | Quadriceps |
| 11          | N/A      | N/A        |
| 12          | N/A      | N/A        |
| 13          | N/A      | N/A        |
| 14          | N/A      | N/A        |
| 15          | N/A      | N/A        |



## Gel 7

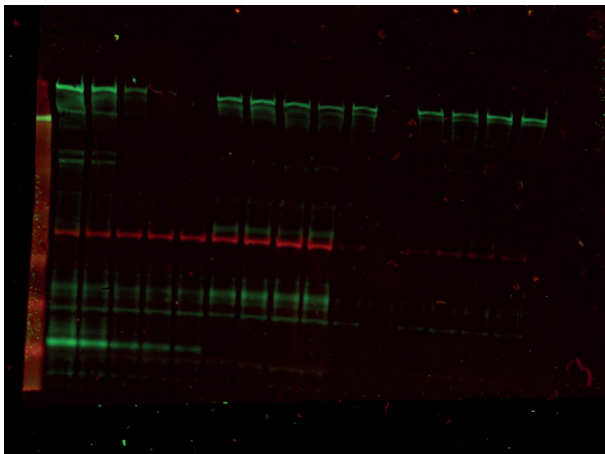

| Lane Number | Mouse ID | Tissue     |
|-------------|----------|------------|
| 1           | 32% WT   | Standard   |
| 2           | 16% WT   | Standard   |
| 3           | 4% WT    | Standard   |
| 4           | 1% WT    | Standard   |
| 5           | 0% WT    | Standard   |
| 6           | 6        | Quadriceps |
| 7           | 8        | Quadriceps |
| 8           | 9        | Quadriceps |
| 9           | 10       | Quadriceps |
| 10          | 13       | Quadriceps |
| 11          | 14       | Quadriceps |
| 12          | 15       | Quadriceps |
| 13          | 18       | Quadriceps |
| 14          | 19       | Quadriceps |
| 15          | 20       | Quadriceps |

## Gel 8

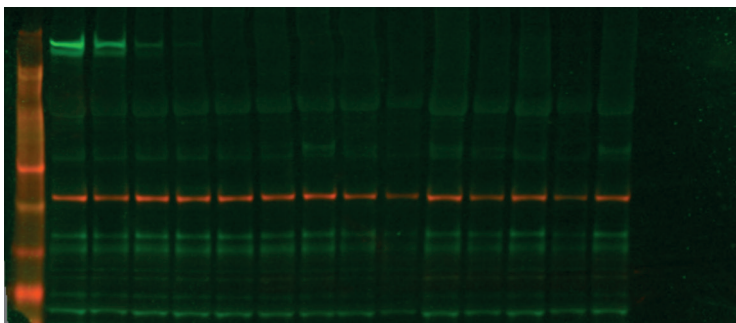

| Lane Number | Mouse ID | Tissue     |
|-------------|----------|------------|
| 1           | 32% WT   | Standard   |
| 2           | 16% WT   | Standard   |
| 3           | 4% WT    | Standard   |
| 4           | 1% WT    | Standard   |
| 5           | 0% WT    | Standard   |
| 6           | 51       | Quadriceps |
| 7           | 52       | Quadriceps |
| 8           | 53       | Quadriceps |
| 9           | 54       | Quadriceps |
| 10          | 56       | Quadriceps |
| 11          | 57       | Quadriceps |
| 12          | 58       | Quadriceps |
| 13          | 59       | Quadriceps |
| 14          | 60       | Quadriceps |
| 15          | N/A      | N/A        |

## Gel 9

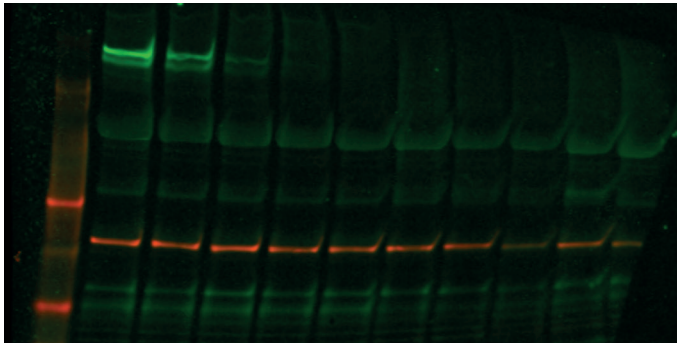

| Lane Number | Mouse ID | Tissue     |
|-------------|----------|------------|
| 1           | 32% WT   | Standard   |
| 2           | 16% WT   | Standard   |
| 3           | 4% WT    | Standard   |
| 4           | 1% WT    | Standard   |
| 5           | 0% WT    | Standard   |
| 6           | 61       | Quadriceps |
| 7           | 62       | Quadriceps |
| 8           | 63       | Quadriceps |
| 9           | 64       | Quadriceps |
| 10          | 65       | Quadriceps |
| 11          | N/A      | N/A        |
| 12          | N/A      | N/A        |
| 13          | N/A      | N/A        |
| 14          | N/A      | N/A        |
| 15          | N/A      | N/A        |

## Gel 10

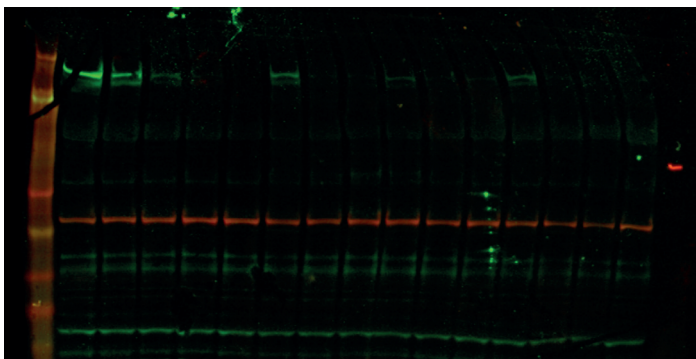

| Lane Number | Mouse ID | Tissue     |
|-------------|----------|------------|
| 1           | 32% WT   | Standard   |
| 2           | 16% WT   | Standard   |
| 3           | 4% WT    | Standard   |
| 4           | 1% WT    | Standard   |
| 5           | 0% WT    | Standard   |
| 6           | 66       | Quadriceps |
| 7           | 67       | Quadriceps |
| 8           | 68       | Quadriceps |
| 9           | 69       | Quadriceps |
| 10          | 70       | Quadriceps |
| 11          | 71       | Quadriceps |
| 12          | 72       | Quadriceps |
| 13          | 73       | Quadriceps |
| 14          | 74       | Quadriceps |
| 15          | 75       | Quadriceps |

## Gel 11

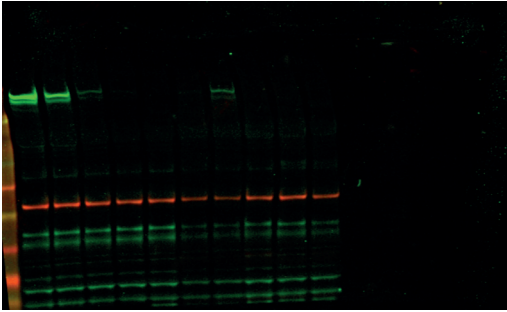

| Lane Number | Mouse ID | Tissue     |
|-------------|----------|------------|
| 1           | 32% WT   | Standard   |
| 2           | 16% WT   | Standard   |
| 3           | 4% WT    | Standard   |
| 4           | 1% WT    | Standard   |
| 5           | 0% WT    | Standard   |
| 6           | 76       | Quadriceps |
| 7           | 77       | Quadriceps |
| 8           | 78       | Quadriceps |
| 9           | 79       | Quadriceps |
| 10          | 80       | Quadriceps |
| 11          | N/A      | N/A        |
| 12          | N/A      | N/A        |
| 13          | N/A      | N/A        |
| 14          | N/A      | N/A        |
| 15          | N/A      | N/A        |

## Gel 12

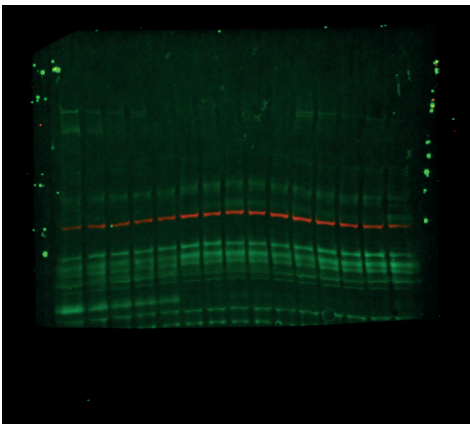

| Lane Number | Mouse ID | Tissue            |
|-------------|----------|-------------------|
| 1           | 16% WT   | Standard          |
| 2           | 4% WT    | Standard          |
| 3           | 2% WT    | Standard          |
| 4           | 1% WT    | Standard          |
| 5           | 0% WT    | Standard          |
| 6           | 31       | Tibialis Anterior |
| 7           | 32       | Tibialis Anterior |
| 8           | 33       | Tibialis Anterior |
| 9           | 34       | Tibialis Anterior |
| 10          | 35       | Tibialis Anterior |
| 11          | 36       | Tibialis Anterior |
| 12          | 37       | Tibialis Anterior |
| 13          | N/A      | N/A               |
| 14          | N/A      | N/A               |
| 15          | N/A      | N/A               |

### Gel 13

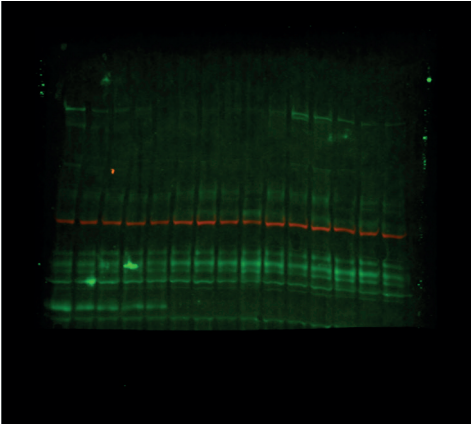

| Lane Number | Mouse ID | Tissue            |
|-------------|----------|-------------------|
| 1           | 16% WT   | Standard          |
| 2           | 4% WT    | Standard          |
| 3           | 2% WT    | Standard          |
| 4           | 1% WT    | Standard          |
| 5           | 0% WT    | Standard          |
| 6           | 1        | Tibialis Anterior |
| 7           | 2        | Tibialis Anterior |
| 8           | 3        | Tibialis Anterior |
| 9           | 4        | Tibialis Anterior |
| 10          | 5        | Tibialis Anterior |
| 11          | 6        | Tibialis Anterior |
| 12          | 7        | Tibialis Anterior |
| 13          | N/A      | N/A               |
| 14          | N/A      | N/A               |
| 15          | N/A      | N/A               |

### Gel 14

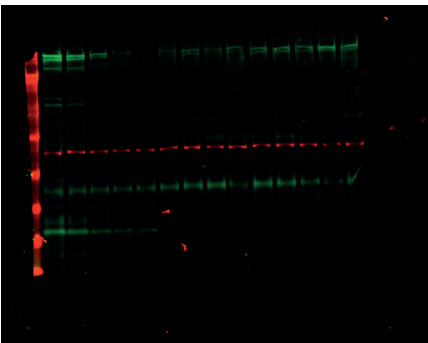

| Lane Number | Mouse ID | Tissue            |
|-------------|----------|-------------------|
| 1           | 32% WT   | Standard          |
| 2           | 16% WT   | Standard          |
| 3           | 4% WT    | Standard          |
| 4           | 1% WT    | Standard          |
| 5           | 0% WT    | Standard          |
| 6           | 38       | Tibialis Anterior |
| 7           | 39       | Tibialis Anterior |
| 8           | 40       | Tibialis Anterior |
| 9           | 49       | Tibialis Anterior |
| 10          | 8        | Tibialis Anterior |
| 11          | 9        | Tibialis Anterior |
| 12          | 10       | Tibialis Anterior |
| 13          | 46       | Tibialis Anterior |
| 14          | 47       | Tibialis Anterior |
| 15          | N/A      | N/A               |

## Gel 15

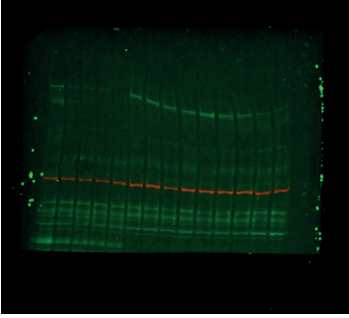

| Lane Number | Mouse ID | Tissue            |
|-------------|----------|-------------------|
| 1           | 16% WT   | Standard          |
| 2           | 4% WT    | Standard          |
| 3           | 2% WT    | Standard          |
| 4           | 1% WT    | Standard          |
| 5           | 0% WT    | Standard          |
| 6           | 41       | Tibialis Anterior |
| 7           | 42       | Tibialis Anterior |
| 8           | 43       | Tibialis Anterior |
| 9           | 44       | Tibialis Anterior |
| 10          | N/A      | N/A               |
| 11          | N/A      | N/A               |
| 12          | 48       | Tibialis Anterior |
| 13          | N/A      | N/A               |
| 14          | 50       | Tibialis Anterior |
| 15          | N/A      | N/A               |

## Gel 16

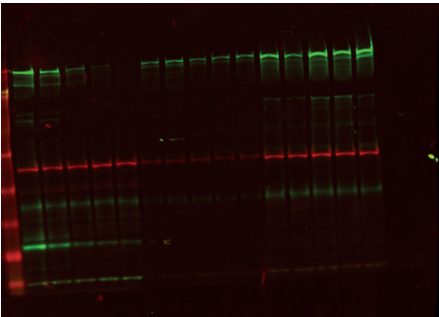

| Lane Number | Mouse ID | Tissue            |
|-------------|----------|-------------------|
| 1           | 32% WT   | Standard          |
| 2           | 16% WT   | Standard          |
| 3           | 4% WT    | Standard          |
| 4           | 1% WT    | Standard          |
| 5           | 0% WT    | Standard          |
| 6           | 11       | Tibialis Anterior |
| 7           | 12       | Tibialis Anterior |
| 8           | 13       | Tibialis Anterior |
| 9           | 14       | Tibialis Anterior |
| 10          | 15       | Tibialis Anterior |
| 11          | 16       | Tibialis Anterior |
| 12          | 17       | Tibialis Anterior |
| 13          | 18       | Tibialis Anterior |
| 14          | 19       | Tibialis Anterior |
| 15          | 20       | Tibialis Anterior |

## Gel 17

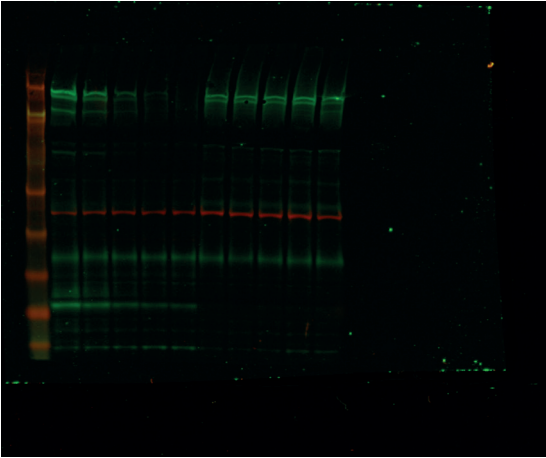

| Lane Number | Mouse ID | Tissue            |
|-------------|----------|-------------------|
| 1           | 32% WT   | Standard          |
| 2           | 16% WT   | Standard          |
| 3           | 4% WT    | Standard          |
| 4           | 1% WT    | Standard          |
| 5           | 0% WT    | Standard          |
| 6           | 21       | Tibialis Anterior |
| 7           | 22       | Tibialis Anterior |
| 8           | 23       | Tibialis Anterior |
| 9           | 24       | Tibialis Anterior |
| 10          | 25       | Tibialis Anterior |
| 11          | N/A      | N/A               |
| 12          | N/A      | N/A               |
| 13          | N/A      | N/A               |
| 14          | N/A      | N/A               |
| 15          | N/A      | N/A               |

## Gel 18

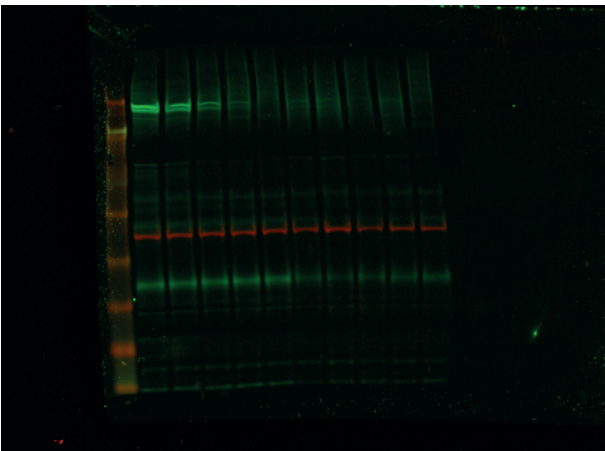

| Lane Number | Mouse ID | Tissue            |
|-------------|----------|-------------------|
| 1           | 32% WT   | Standard          |
| 2           | 16% WT   | Standard          |
| 3           | 4% WT    | Standard          |
| 4           | 1% WT    | Standard          |
| 5           | 0% WT    | Standard          |
| 6           | 26       | Tibialis Anterior |
| 7           | 27       | Tibialis Anterior |
| 8           | 28       | Tibialis Anterior |
| 9           | 29       | Tibialis Anterior |
| 10          | 30       | Tibialis Anterior |
| 11          | N/A      | N/A               |
| 12          | N/A      | N/A               |
| 13          | N/A      | N/A               |
| 14          | N/A      | N/A               |
| 15          | N/A      | N/A               |

## Gel 19

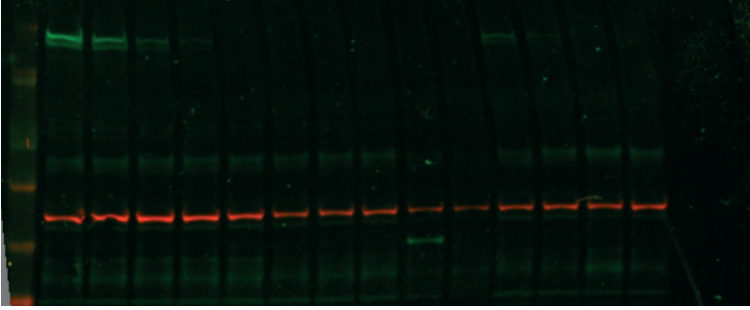

| Lane Number | Mouse ID | Tissue            |
|-------------|----------|-------------------|
| 1           | 32% WT   | Standard          |
| 2           | 16% WT   | Standard          |
| 3           | 4% WT    | Standard          |
| 4           | 1% WT    | Standard          |
| 5           | 0% WT    | Standard          |
| 6           | 51       | Tibialis Anterior |
| 7           | 52       | Tibialis Anterior |
| 8           | 53       | Tibialis Anterior |
| 9           | 54       | Tibialis Anterior |
| 10          | 71       | Tibialis Anterior |
| 11          | 72       | Tibialis Anterior |
| 12          | 73       | Tibialis Anterior |
| 13          | 74       | Tibialis Anterior |
| 14          | 75       | Tibialis Anterior |
| 15          | N/A      | N/A               |

## Gel 20

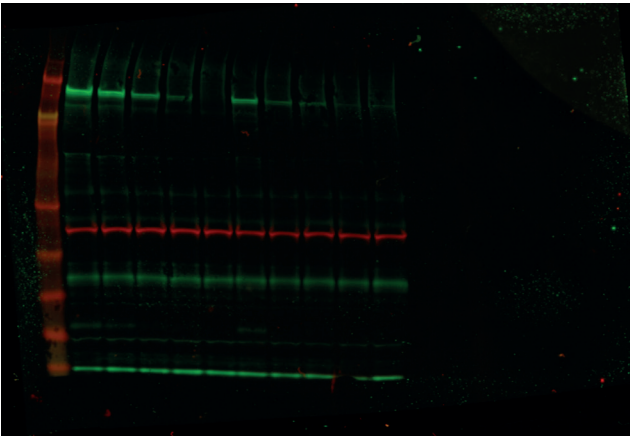

| Lane Number | Mouse ID | Tissue            |
|-------------|----------|-------------------|
| 1           | 32% WT   | Standard          |
| 2           | 16% WT   | Standard          |
| 3           | 4% WT    | Standard          |
| 4           | 1% WT    | Standard          |
| 5           | 0% WT    | Standard          |
| 6           | 66       | Tibialis Anterior |
| 7           | 67       | Tibialis Anterior |
| 8           | 68       | Tibialis Anterior |
| 9           | 69       | Tibialis Anterior |
| 10          | 70       | Tibialis Anterior |
| 11          | N/A      | N/A               |
| 12          | N/A      | N/A               |
| 13          | N/A      | N/A               |
| 14          | N/A      | N/A               |
| 15          | N/A      | N/A               |

## Gel 21

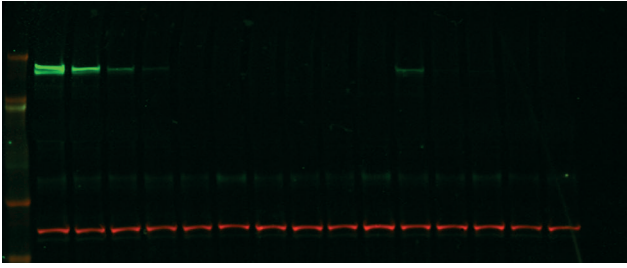

| Lane Number | Mouse ID | Tissue            |
|-------------|----------|-------------------|
| 1           | 32% WT   | Standard          |
| 2           | 16% WT   | Standard          |
| 3           | 4% WT    | Standard          |
| 4           | 1% WT    | Standard          |
| 5           | 0% WT    | Standard          |
| 6           | 56       | Tibialis Anterior |
| 7           | 57       | Tibialis Anterior |
| 8           | 58       | Tibialis Anterior |
| 9           | 59       | Tibialis Anterior |
| 10          | 60       | Tibialis Anterior |
| 11          | 76       | Tibialis Anterior |
| 12          | 77       | Tibialis Anterior |
| 13          | 78       | Tibialis Anterior |
| 14          | 79       | Tibialis Anterior |
| 15          | 80       | Tibialis Anterior |

## Gel 22

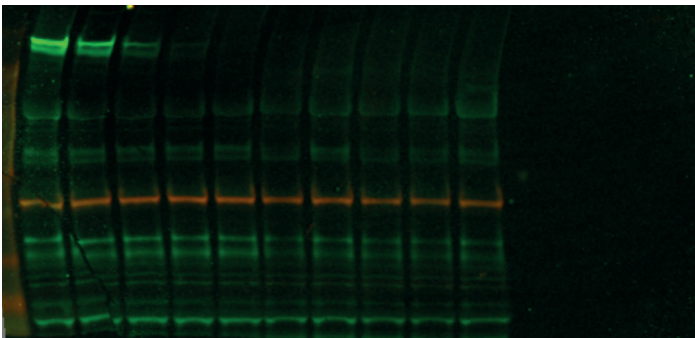

| Lane Number | Mouse ID | Tissue            |
|-------------|----------|-------------------|
| 1           | 32% WT   | Standard          |
| 2           | 16% WT   | Standard          |
| 3           | 4% WT    | Standard          |
| 4           | 1% WT    | Standard          |
| 5           | 0% WT    | Standard          |
| 6           | 61       | Tibialis Anterior |
| 7           | 62       | Tibialis Anterior |
| 8           | 63       | Tibialis Anterior |
| 9           | 64       | Tibialis Anterior |
| 10          | 65       | Tibialis Anterior |
| 11          | N/A      | N/A               |
| 12          | N/A      | N/A               |
| 13          | N/A      | N/A               |
| 14          | N/A      | N/A               |
| 15          | N/A      | N/A               |



## Gel 23

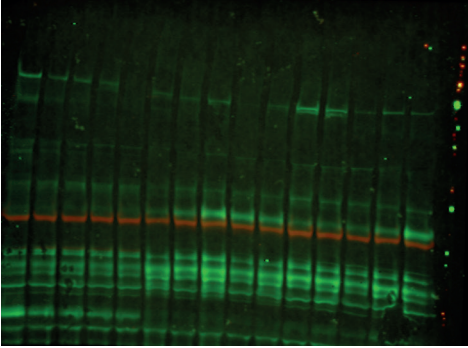

| Lane Number | Mouse ID | Tissue        |
|-------------|----------|---------------|
| 1           | 16% WT   | Standard      |
| 2           | 4% WT    | Standard      |
| 3           | 2% WT    | Standard      |
| 4           | 1% WT    | Standard      |
| 5           | 0% WT    | Standard      |
| 6           | 31       | Gastrocnemius |
| 7           | 32       | Gastrocnemius |
| 8           | 33       | Gastrocnemius |
| 9           | 34       | Gastrocnemius |
| 10          | 35       | Gastrocnemius |
| 11          | 36       | Gastrocnemius |
| 12          | 37       | Gastrocnemius |
| 13          | N/A      | N/A           |
| 14          | N/A      | N/A           |
| 15          | N/A      | N/A           |

## Gel 24

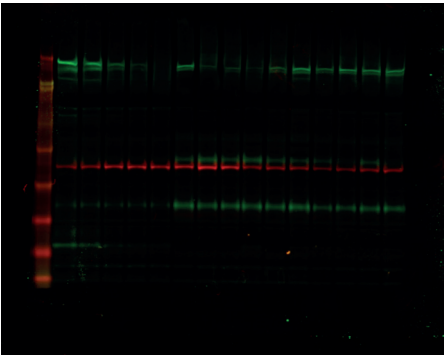

| Lane Number | Mouse ID | Tissue        |
|-------------|----------|---------------|
| 1           | 32% WT   | Standard      |
| 2           | 16% WT   | Standard      |
| 3           | 4% WT    | Standard      |
| 4           | 1% WT    | Standard      |
| 5           | 0% WT    | Standard      |
| 6           | 1        | Gastrocnemius |
| 7           | 2        | Gastrocnemius |
| 8           | 3        | Gastrocnemius |
| 9           | 4        | Gastrocnemius |
| 10          | 5        | Gastrocnemius |
| 11          | 6        | Gastrocnemius |
| 12          | 7        | Gastrocnemius |
| 13          | 8        | Gastrocnemius |
| 14          | 9        | Gastrocnemius |
| 15          | 10       | Gastrocnemius |

## Gel 25

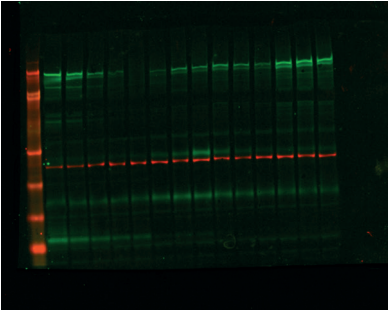

| Lane Number | Mouse ID | Tissue        |
|-------------|----------|---------------|
| 1           | 32% WT   | Standard      |
| 2           | 16% WT   | Standard      |
| 3           | 4% WT    | Standard      |
| 4           | 1% WT    | Standard      |
| 5           | 0% WT    | Standard      |
| 6           | 38       | Gastrocnemius |
| 7           | 39       | Gastrocnemius |
| 8           | 40       | Gastrocnemius |
| 9           | 48       | Gastrocnemius |
| 10          | 49       | Gastrocnemius |
| 11          | 50       | Gastrocnemius |
| 12          | 18       | Gastrocnemius |
| 13          | 19       | Gastrocnemius |
| 14          | 20       | Gastrocnemius |
| 15          | N/A      | N/A           |

## Gel 26

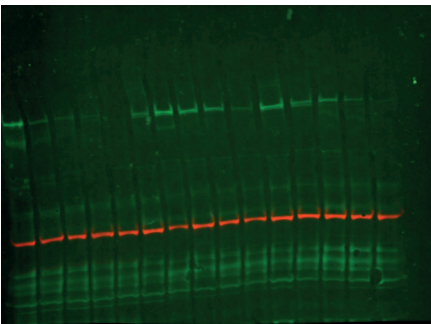

| Lane Number | Mouse ID | Tissue        |
|-------------|----------|---------------|
| 1           | 16% WT   | Standard      |
| 2           | 4% WT    | Standard      |
| 3           | 2% WT    | Standard      |
| 4           | 1% WT    | Standard      |
| 5           | 0% WT    | Standard      |
| 6           | 41       | Gastrocnemius |
| 7           | 42       | Gastrocnemius |
| 8           | 43       | Gastrocnemius |
| 9           | 44       | Gastrocnemius |
| 10          | 45       | Gastrocnemius |
| 11          | 46       | Gastrocnemius |
| 12          | 47       | Gastrocnemius |
| 13          | N/A      | N/A           |
| 14          | N/A      | N/A           |
| 15          | N/A      | N/A           |

## Gel 27

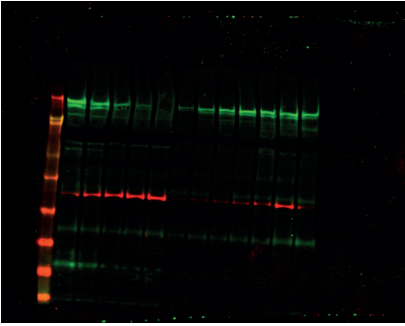

| Lane Number | Mouse ID | Tissue        |
|-------------|----------|---------------|
| 1           | 32% WT   | Standard      |
| 2           | 16% WT   | Standard      |
| 3           | 4% WT    | Standard      |
| 4           | 1% WT    | Standard      |
| 5           | 0% WT    | Standard      |
| 6           | 11       | Gastrocnemius |
| 7           | 12       | Gastrocnemius |
| 8           | 13       | Gastrocnemius |
| 9           | 14       | Gastrocnemius |
| 10          | 15       | Gastrocnemius |
| 11          | 17       | Gastrocnemius |
| 12          | N/A      | N/A           |
| 13          | N/A      | N/A           |
| 14          | N/A      | N/A           |
| 15          | N/A      | N/A           |

## Gel 28

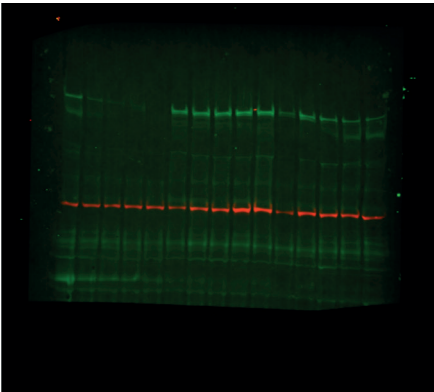

| Lane Number | Mouse ID | Tissue        |
|-------------|----------|---------------|
| 1           | 16% WT   | Standard      |
| 2           | 4% WT    | Standard      |
| 3           | 2% WT    | Standard      |
| 4           | 1% WT    | Standard      |
| 5           | 0% WT    | Standard      |
| 6           | N/A      | N/A           |
| 7           | N/A      | N/A           |
| 8           | N/A      | N/A           |
| 9           | N/A      | N/A           |
| 10          | N/A      | N/A           |
| 11          | 16       | Gastrocnemius |
| 12          | N/A      | N/A           |
| 13          | N/A      | N/A           |
| 14          | N/A      | N/A           |
| 15          | N/A      | N/A           |

## Gel 29

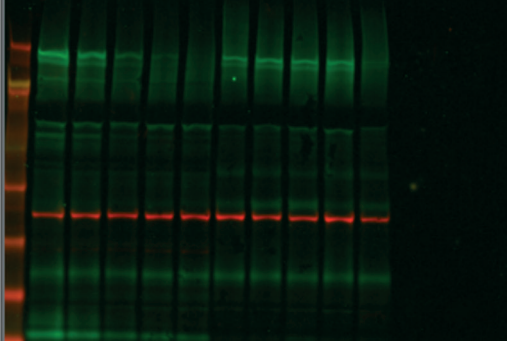

| Lane Number | Mouse ID | Tissue        |
|-------------|----------|---------------|
| 1           | 32% WT   | Standard      |
| 2           | 16% WT   | Standard      |
| 3           | 4% WT    | Standard      |
| 4           | 1% WT    | Standard      |
| 5           | 0% WT    | Standard      |
| 6           | 21       | Gastrocnemius |
| 7           | 22       | Gastrocnemius |
| 8           | 23       | Gastrocnemius |
| 9           | 24       | Gastrocnemius |
| 10          | 25       | Gastrocnemius |
| 11          | N/A      | N/A           |
| 12          | N/A      | N/A           |
| 13          | N/A      | N/A           |
| 14          | N/A      | N/A           |
| 15          | N/A      | N/A           |

## Gel 30

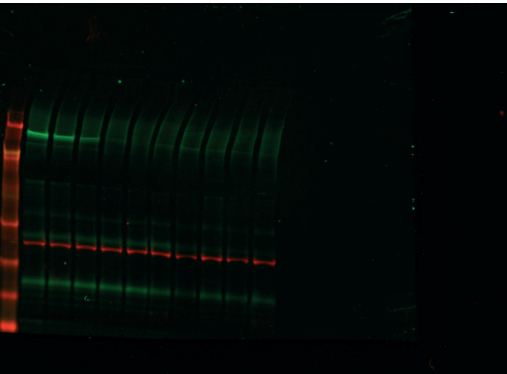

| Lane Number | Mouse ID | Tissue        |
|-------------|----------|---------------|
| 1           | 32% WT   | Standard      |
| 2           | 16% WT   | Standard      |
| 3           | 4% WT    | Standard      |
| 4           | 1% WT    | Standard      |
| 5           | 0% WT    | Standard      |
| 6           | 26       | Gastrocnemius |
| 7           | 27       | Gastrocnemius |
| 8           | 28       | Gastrocnemius |
| 9           | 29       | Gastrocnemius |
| 10          | 30       | Gastrocnemius |
| 11          | N/A      | N/A           |
| 12          | N/A      | N/A           |
| 13          | N/A      | N/A           |
| 14          | N/A      | N/A           |
| 15          | N/A      | N/A           |

### Gel 31

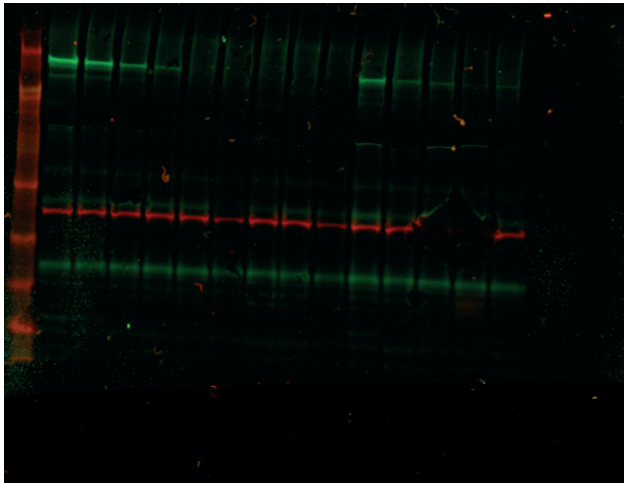

| Lane Number | Mouse ID | Tissue        |
|-------------|----------|---------------|
| 1           | 32% WT   | Standard      |
| 2           | 16% WT   | Standard      |
| 3           | 4% WT    | Standard      |
| 4           | 1% WT    | Standard      |
| 5           | 0% WT    | Standard      |
| 6           | 51       | Gastrocnemius |
| 7           | 52       | Gastrocnemius |
| 8           | 53       | Gastrocnemius |
| 9           | 54       | Gastrocnemius |
| 10          | 71       | Gastrocnemius |
| 11          | 72       | Gastrocnemius |
| 12          | N/A      | N/A           |
| 13          | N/A      | N/A           |
| 14          | 75       | Gastrocnemius |
| 15          | N/A      | N/A           |

### Gel 32

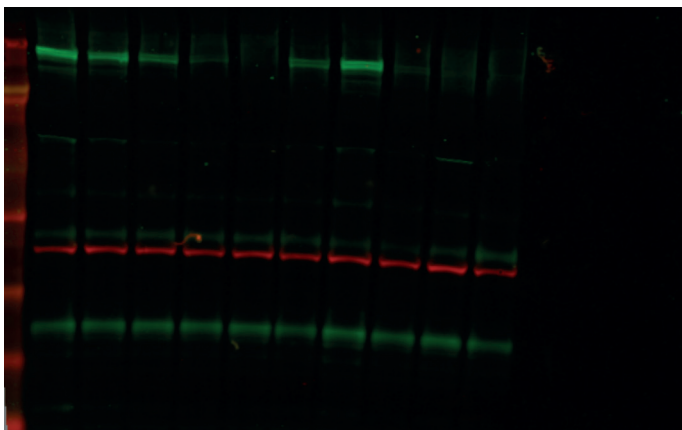

| Lane Number | Mouse ID | Tissue        |
|-------------|----------|---------------|
| 1           | 32% WT   | Standard      |
| 2           | 16% WT   | Standard      |
| 3           | 4% WT    | Standard      |
| 4           | 1% WT    | Standard      |
| 5           | 0% WT    | Standard      |
| 6           | 66       | Gastrocnemius |
| 7           | 67       | Gastrocnemius |
| 8           | 68       | Gastrocnemius |
| 9           | 69       | Gastrocnemius |
| 10          | 70       | Gastrocnemius |
| 11          | N/A      | N/A           |
| 12          | N/A      | N/A           |
| 13          | N/A      | N/A           |
| 14          | N/A      | N/A           |
| 15          | N/A      | N/A           |

### Gel 33

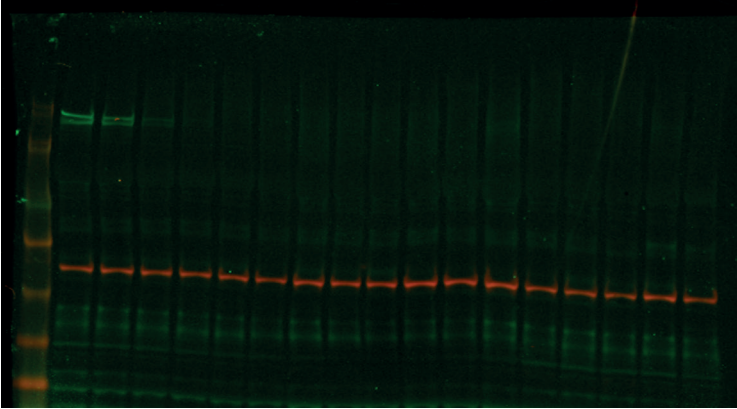

| Lane Number | Mouse ID | Tissue        |
|-------------|----------|---------------|
| 1           | 32% WT   | Standard      |
| 2           | 16% WT   | Standard      |
| 3           | 4% WT    | Standard      |
| 4           | 1% WT    | Standard      |
| 5           | 0% WT    | Standard      |
| 6           | 56       | Gastrocnemius |
| 7           | 57       | Gastrocnemius |
| 8           | 58       | Gastrocnemius |
| 9           | 59       | Gastrocnemius |
| 10          | 60       | Gastrocnemius |
| 11          | 76       | Gastrocnemius |
| 12          | 77       | Gastrocnemius |
| 13          | 78       | Gastrocnemius |
| 14          | 79       | Gastrocnemius |
| 15          | 80       | Gastrocnemius |
| 16          | 73       | Gastrocnemius |
| 17          | 74       | Gastrocnemius |

### Gel 34

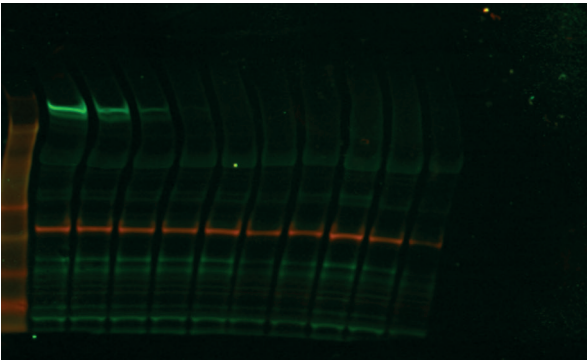

| Lane Number | Mouse ID | Tissue        |
|-------------|----------|---------------|
| 1           | 32% WT   | Standard      |
| 2           | 16% WT   | Standard      |
| 3           | 4% WT    | Standard      |
| 4           | 1% WT    | Standard      |
| 5           | 0% WT    | Standard      |
| 6           | 61       | Gastrocnemius |
| 7           | 62       | Gastrocnemius |
| 8           | 63       | Gastrocnemius |
| 9           | 64       | Gastrocnemius |
| 10          | 65       | Gastrocnemius |
| 11          | N/A      | N/A           |
| 12          | N/A      | N/A           |
| 13          | N/A      | N/A           |
| 14          | N/A      | N/A           |
| 15          | N/A      | N/A           |

## Gel 35

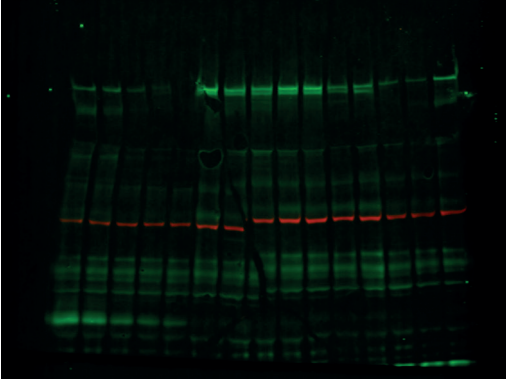

| Lane Number | Mouse ID | Tissue    |
|-------------|----------|-----------|
| 1           | 16% WT   | Standard  |
| 2           | 4% WT    | Standard  |
| 3           | 2% WT    | Standard  |
| 4           | 1% WT    | Standard  |
| 5           | 0% WT    | Standard  |
| 6           | 1        | Diaphragm |
| 7           | 2        | Diaphragm |
| 8           | 3        | Diaphragm |
| 9           | 4        | Diaphragm |
| 10          | 5        | Diaphragm |
| 11          | 6        | Diaphragm |
| 12          | N/A      | N/A       |
| 13          | N/A      | N/A       |
| 14          | N/A      | N/A       |
| 15          | N/A      | N/A       |

## Gel 36

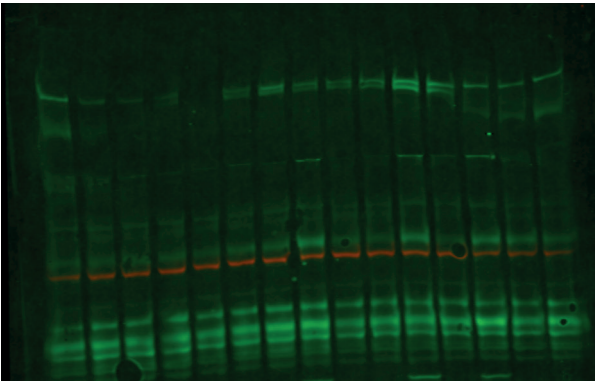

| Lane Number | Mouse ID | Tissue    |
|-------------|----------|-----------|
| 1           | 16% WT   | Standard  |
| 2           | 4% WT    | Standard  |
| 3           | 2% WT    | Standard  |
| 4           | 1% WT    | Standard  |
| 5           | 0% WT    | Standard  |
| 6           | 36       | Diaphragm |
| 7           | 37       | Diaphragm |
| 8           | 38       | Diaphragm |
| 9           | 39       | Diaphragm |
| 10          | 40       | Diaphragm |
| 11          | 41       | Diaphragm |
| 12          | 42       | Diaphragm |
| 13          | 43       | Diaphragm |
| 14          | 44       | Diaphragm |
| 15          | 45       | Diaphragm |

## Gel 37

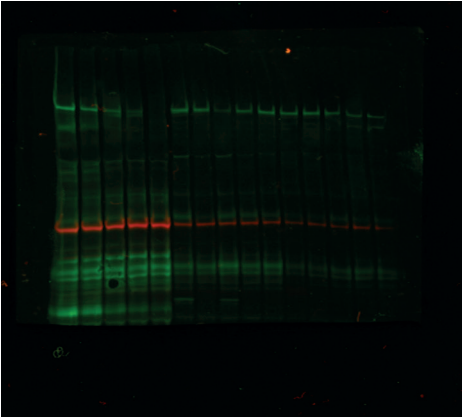

| Lane Number | Mouse ID | Tissue    |
|-------------|----------|-----------|
| 1           | 32% WT   | Standard  |
| 2           | 16% WT   | Standard  |
| 3           | 4% WT    | Standard  |
| 4           | 1% WT    | Standard  |
| 5           | 0% WT    | Standard  |
| 6           | N/A      | N/A       |
| 7           | N/A      | N/A       |
| 8           | N/A      | N/A       |
| 9           | N/A      | N/A       |
| 10          | N/A      | N/A       |
| 11          | 11       | Diaphragm |
| 12          | 12       | Diaphragm |
| 13          | 13       | Diaphragm |
| 14          | 14       | Diaphragm |
| 15          | 15       | Diaphragm |

## Gel 38

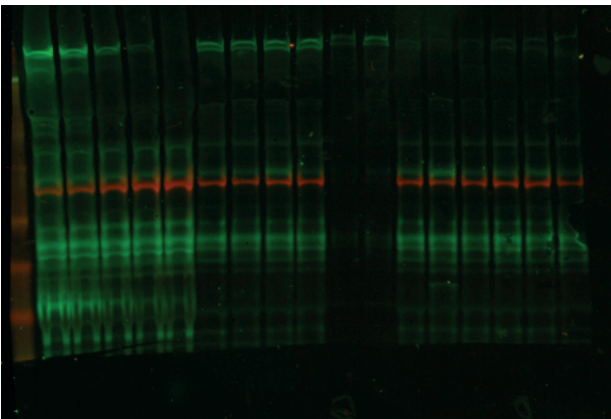

| Lane Number | Mouse ID | Tissue    |
|-------------|----------|-----------|
| 1           | 32% WT   | Standard  |
| 2           | 16% WT   | Standard  |
| 3           | 4% WT    | Standard  |
| 4           | 1% WT    | Standard  |
| 5           | 0% WT    | Standard  |
| 6           | 7        | Diaphragm |
| 7           | 8        | Diaphragm |
| 8           | 9        | Diaphragm |
| 9           | 10       | Diaphragm |
| 10          | N/A      | N/A       |
| 11          | N/A      | N/A       |
| 12          | 31       | Diaphragm |
| 13          | 32       | Diaphragm |
| 14          | 33       | Diaphragm |
| 15          | 34       | Diaphragm |
| 16          | 35       | Diaphragm |
| 17          | 49       | Diaphragm |



### Gel 39

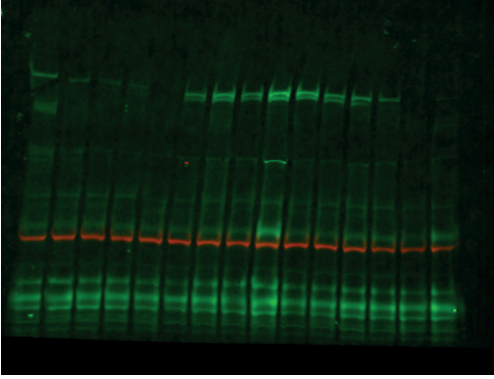

| Lane Number | Mouse ID | Tissue    |
|-------------|----------|-----------|
| 1           | 32% WT   | Standard  |
| 2           | 16% WT   | Standard  |
| 3           | 4% WT    | Standard  |
| 4           | 1% WT    | Standard  |
| 5           | 0% WT    | Standard  |
| 6           | N/A      | Diaphragm |
| 7           | N/A      | Diaphragm |
| 8           | 18       | Diaphragm |
| 9           | N/A      | Diaphragm |
| 10          | N/A      | Diaphragm |
| 11          | 46       | Diaphragm |
| 12          | 47       | Diaphragm |
| 13          | 48       | Diaphragm |
| 14          | N/A      | Diaphragm |
| 15          | 50       | Diaphragm |

### Gel 40

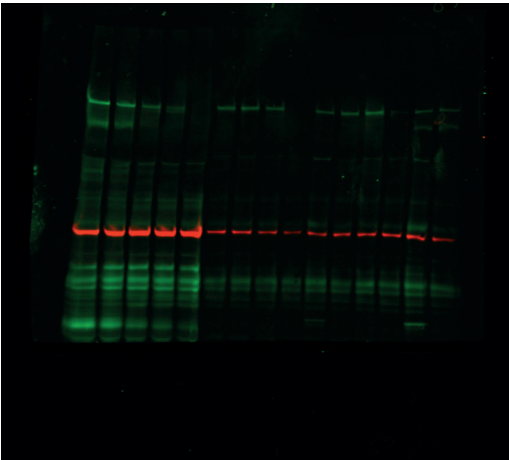

| Lane Number | Mouse ID | Tissue    |
|-------------|----------|-----------|
| 1           | 32% WT   | Standard  |
| 2           | 16% WT   | Standard  |
| 3           | 4% WT    | Standard  |
| 4           | 1% WT    | Standard  |
| 5           | 0% WT    | Standard  |
| 6           | 16       | Diaphragm |
| 7           | 17       | Diaphragm |
| 8           | N/A      | N/A       |
| 9           | 19       | Diaphragm |
| 10          | 20       | Diaphragm |
| 11          | N/A      | N/A       |
| 12          | N/A      | N/A       |
| 13          | N/A      | N/A       |
| 14          | N/A      | N/A       |
| 15          | N/A      | N/A       |

## Gel 41

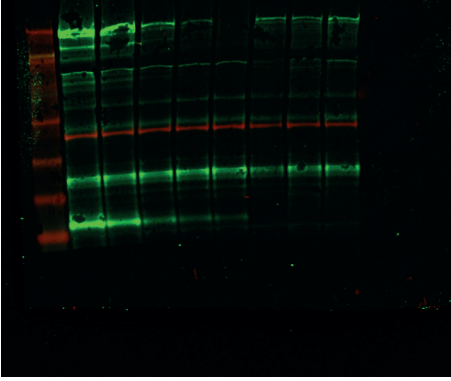

| Lane Number | Mouse ID | Tissue    |
|-------------|----------|-----------|
| 1           | 32% WT   | Standard  |
| 2           | 16% WT   | Standard  |
| 3           | 4% WT    | Standard  |
| 4           | 1% WT    | Standard  |
| 5           | 0% WT    | Standard  |
| 6           | 21       | Diaphragm |
| 7           | 22       | Diaphragm |
| 8           | 23       | Diaphragm |
| 9           | N/A      | N/A       |
| 10          | N/A      | N/A       |
| 11          | N/A      | N/A       |
| 12          | N/A      | N/A       |
| 13          | N/A      | N/A       |
| 14          | N/A      | N/A       |
| 15          | N/A      | N/A       |

## Gel 42

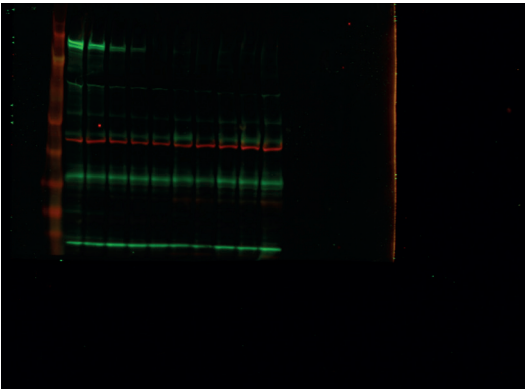

| Lane Number | Mouse ID | Tissue    |
|-------------|----------|-----------|
| 1           | 32% WT   | Standard  |
| 2           | 16% WT   | Standard  |
| 3           | 4% WT    | Standard  |
| 4           | 1% WT    | Standard  |
| 5           | 0% WT    | Standard  |
| 6           | 26       | Diaphragm |
| 7           | 27       | Diaphragm |
| 8           | 28       | Diaphragm |
| 9           | 29       | Diaphragm |
| 10          | 30       | Diaphragm |
| 11          | N/A      | N/A       |
| 12          | N/A      | N/A       |
| 13          | N/A      | N/A       |
| 14          | N/A      | N/A       |
| 15          | N/A      | N/A       |

### Gel 43

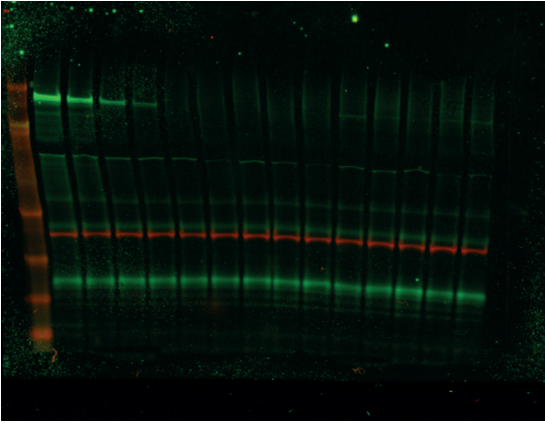

| Lane Number | Mouse ID | Tissue    |
|-------------|----------|-----------|
| 1           | 32% WT   | Standard  |
| 2           | 16% WT   | Standard  |
| 3           | 4% WT    | Standard  |
| 4           | 1% WT    | Standard  |
| 5           | 0% WT    | Standard  |
| 6           | 51       | Diaphragm |
| 7           | 52       | Diaphragm |
| 8           | 53       | Diaphragm |
| 9           | 54       | Diaphragm |
| 10          | 71       | Diaphragm |
| 11          | 72       | Diaphragm |
| 12          | 73       | Diaphragm |
| 13          | 74       | Diaphragm |
| 14          | 75       | Diaphragm |
| 15          | N/A      | N/A       |

### Gel 44

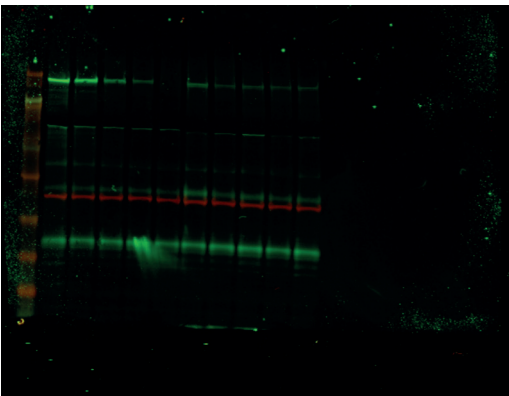

| Lane Number | Mouse ID | Tissue    |
|-------------|----------|-----------|
| 1           | 32% WT   | Standard  |
| 2           | 16% WT   | Standard  |
| 3           | 4% WT    | Standard  |
| 4           | 1% WT    | Standard  |
| 5           | 0% WT    | Standard  |
| 6           | 66       | Diaphragm |
| 7           | 67       | Diaphragm |
| 8           | 68       | Diaphragm |
| 9           | 69       | Diaphragm |
| 10          | 70       | Diaphragm |
| 11          | N/A      | N/A       |
| 12          | N/A      | N/A       |
| 13          | N/A      | N/A       |
| 14          | N/A      | N/A       |
| 15          | N/A      | N/A       |

## Gel 45

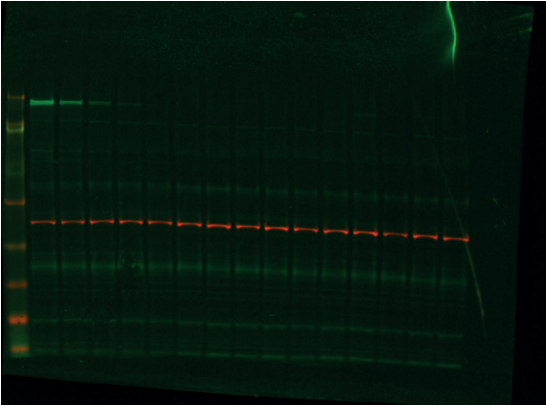

| Lane Number | Mouse ID | Tissue    |
|-------------|----------|-----------|
| 1           | 32% WT   | Standard  |
| 2           | 16% WT   | Standard  |
| 3           | 4% WT    | Standard  |
| 4           | 1% WT    | Standard  |
| 5           | 0% WT    | Standard  |
| 6           | 56       | Diaphragm |
| 7           | 57       | Diaphragm |
| 8           | 58       | Diaphragm |
| 9           | 59       | Diaphragm |
| 10          | 60       | Diaphragm |
| 11          | 76       | Diaphragm |
| 12          | 77       | Diaphragm |
| 13          | 78       | Diaphragm |
| 14          | 79       | Diaphragm |
| 15          | 80       | Diaphragm |

## Gel 46

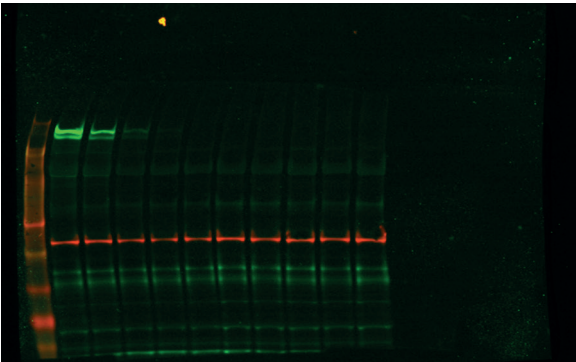

| Lane Number | Mouse ID | Tissue    |
|-------------|----------|-----------|
| 1           | 32% WT   | Standard  |
| 2           | 16% WT   | Standard  |
| 3           | 4% WT    | Standard  |
| 4           | 1% WT    | Standard  |
| 5           | 0% WT    | Standard  |
| 6           | 61       | Diaphragm |
| 7           | 62       | Diaphragm |
| 8           | 63       | Diaphragm |
| 9           | 64       | Diaphragm |
| 10          | 65       | Diaphragm |
| 11          | N/A      | N/A       |
| 12          | N/A      | N/A       |
| 13          | N/A      | N/A       |
| 14          | N/A      | N/A       |
| 15          | N/A      | N/A       |

## Gel 47

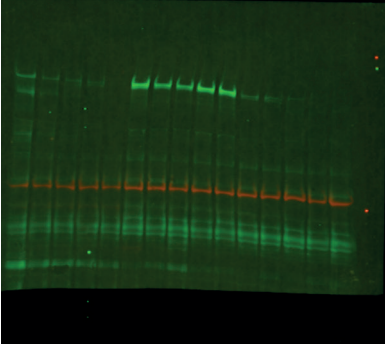

| Lane Number | Mouse ID | Tissue   |
|-------------|----------|----------|
| 1           | 16% WT   | Standard |
| 2           | 4% WT    | Standard |
| 3           | 2% WT    | Standard |
| 4           | 1% WT    | Standard |
| 5           | 0% WT    | Standard |
| 6           | N/A      | N/A      |
| 7           | N/A      | N/A      |
| 8           | N/A      | N/A      |
| 9           | N/A      | N/A      |
| 10          | N/A      | N/A      |
| 11          | 31       | Heart    |
| 12          | 32       | Heart    |
| 13          | 33       | Heart    |
| 14          | 34       | Heart    |
| 15          | 35       | Heart    |

## Gel 48

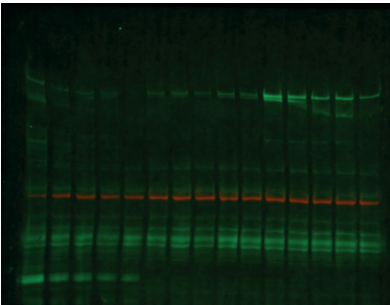

| Lane Number | Mouse ID | Tissue   |
|-------------|----------|----------|
| 1           | 16% WT   | Standard |
| 2           | 4% WT    | Standard |
| 3           | 2% WT    | Standard |
| 4           | 1% WT    | Standard |
| 5           | 0% WT    | Standard |
| 6           | 1        | Heart    |
| 7           | 2        | Heart    |
| 8           | 3        | Heart    |
| 9           | 4        | Heart    |
| 10          | 5        | Heart    |
| 11          | N/A      | N/A      |
| 12          | N/A      | N/A      |
| 13          | N/A      | N/A      |
| 14          | N/A      | N/A      |
| 15          | N/A      | N/A      |

## Gel 49

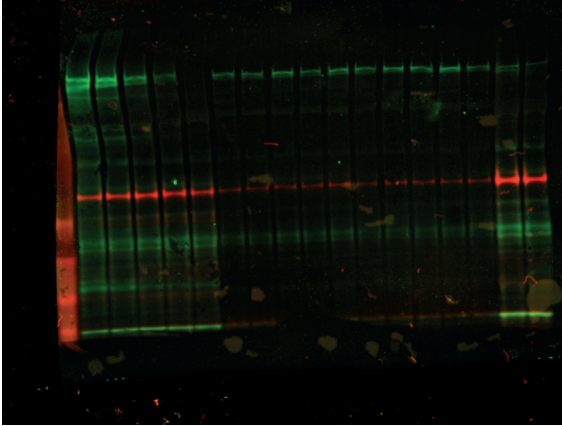

| Lane Number | Mouse ID | Tissue   |
|-------------|----------|----------|
| 1           | 32% WT   | Standard |
| 2           | 16% WT   | Standard |
| 3           | 4% WT    | Standard |
| 4           | 1% WT    | Standard |
| 5           | 0% WT    | Standard |
| 6           | 36       | Heart    |
| 7           | 37       | Heart    |
| 8           | 38       | Heart    |
| 9           | 39       | Heart    |
| 10          | 40       | Heart    |
| 11          | 6        | Heart    |
| 12          | 7        | Heart    |
| 13          | 8        | Heart    |
| 14          | 9        | Heart    |
| 15          | 10       | Heart    |
| 16          | N/A      | N/A      |
| 17          | N/A      | N/A      |

## Gel 50

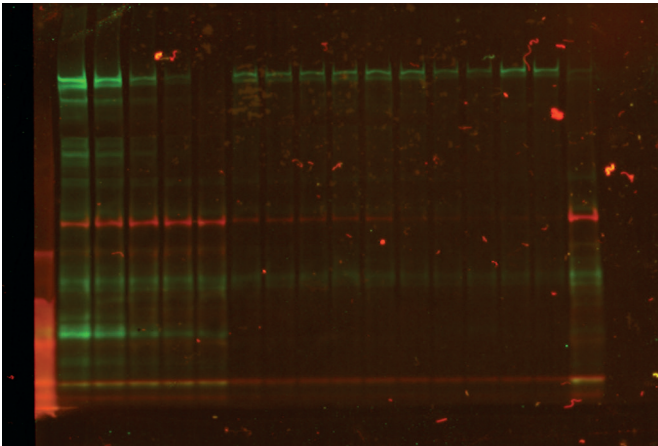

| Lane Number | Mouse ID | Tissue   |
|-------------|----------|----------|
| 1           | 32% WT   | Standard |
| 2           | 16% WT   | Standard |
| 3           | 4% WT    | Standard |
| 4           | 1% WT    | Standard |
| 5           | 0% WT    | Standard |
| 6           | 41       | Heart    |
| 7           | 42       | Heart    |
| 8           | 43       | Heart    |
| 9           | 44       | Heart    |
| 10          | 45       | Heart    |
| 11          | 11       | Heart    |
| 12          | 12       | Heart    |
| 13          | 13       | Heart    |
| 14          | 14       | Heart    |
| 15          | 15       | Heart    |
| 16          | N/A      | N/A      |

## Gel 51

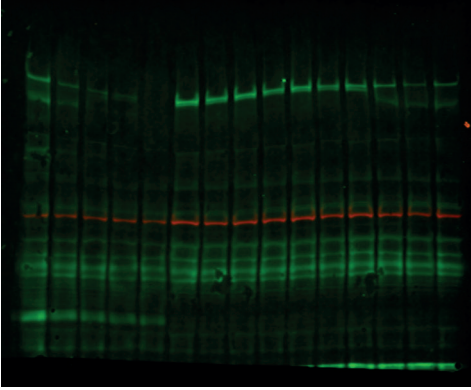

| Lane Number | Mouse ID | Tissue   |
|-------------|----------|----------|
| 1           | 16% WT   | Standard |
| 2           | 4% WT    | Standard |
| 3           | 2% WT    | Standard |
| 4           | 1% WT    | Standard |
| 5           | 0% WT    | Standard |
| 6           | 16       | Heart    |
| 7           | 17       | Heart    |
| 8           | 18       | Heart    |
| 9           | 19       | Heart    |
| 10          | 20       | Heart    |
| 11          | 46       | Heart    |
| 12          | 47       | Heart    |
| 13          | 48       | Heart    |
| 14          | 49       | Heart    |
| 15          | 50       | Heart    |

## Gel 52

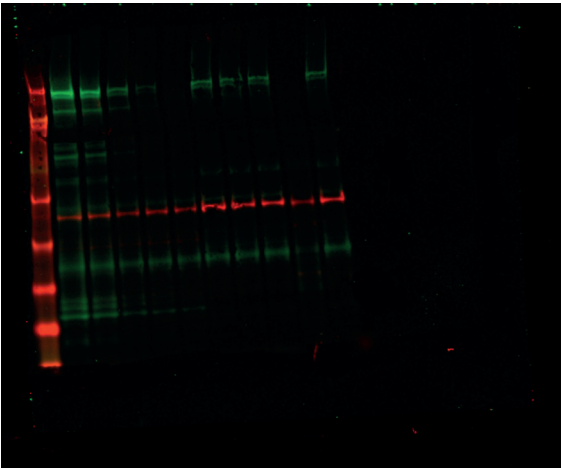

| Lane Number | Mouse ID | Tissue   |
|-------------|----------|----------|
| 1           | 32% WT   | Standard |
| 2           | 16% WT   | Standard |
| 3           | 4% WT    | Standard |
| 4           | 1% WT    | Standard |
| 5           | 0% WT    | Standard |
| 6           | 21       | Heart    |
| 7           | 22       | Heart    |
| 8           | 23       | Heart    |
| 9           | 24       | Heart    |
| 10          | 25       | Heart    |
| 11          | N/A      | N/A      |
| 12          | N/A      | N/A      |
| 13          | N/A      | N/A      |
| 14          | N/A      | N/A      |
| 15          | N/A      | N/A      |

### Gel 53

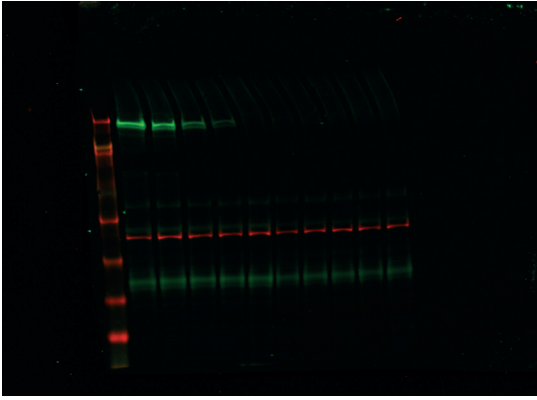

| Lane Number | Mouse ID | Tissue   |
|-------------|----------|----------|
| 1           | 32% WT   | Standard |
| 2           | 16% WT   | Standard |
| 3           | 4% WT    | Standard |
| 4           | 1% WT    | Standard |
| 5           | 0% WT    | Standard |
| 6           | 26       | Heart    |
| 7           | 27       | Heart    |
| 8           | 28       | Heart    |
| 9           | 29       | Heart    |
| 10          | 30       | Heart    |
| 11          | N/A      | N/A      |
| 12          | N/A      | N/A      |
| 13          | N/A      | N/A      |
| 14          | N/A      | N/A      |
| 15          | N/A      | N/A      |

### Gel 54

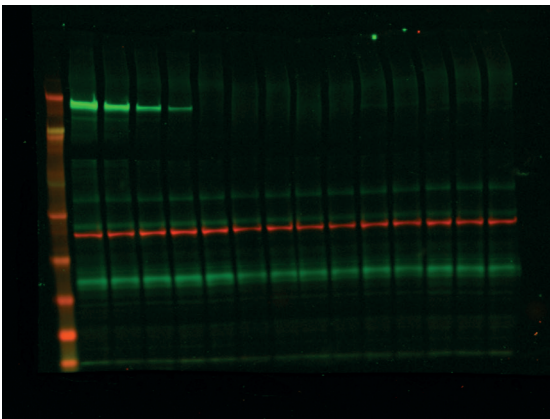

| Lane Number | Mouse ID | Tissue   |
|-------------|----------|----------|
| 1           | 32% WT   | Standard |
| 2           | 16% WT   | Standard |
| 3           | 4% WT    | Standard |
| 4           | 1% WT    | Standard |
| 5           | 0% WT    | Standard |
| 6           | 51       | Heart    |
| 7           | 52       | Heart    |
| 8           | 53       | Heart    |
| 9           | 54       | Heart    |
| 10          | 71       | Heart    |
| 11          | 72       | Heart    |
| 12          | 73       | Heart    |
| 13          | 74       | Heart    |
| 14          | 75       | Heart    |
| 15          | N/A      | N/A      |



## Gel 55

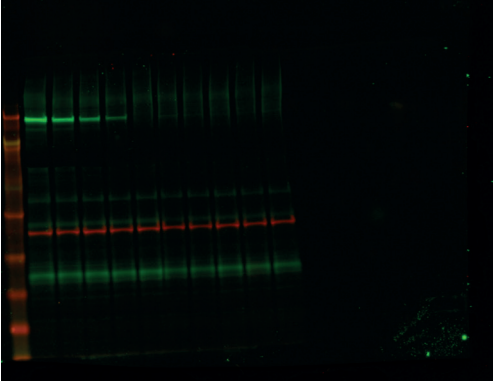

| Lane Number | Mouse ID | Tissue   |
|-------------|----------|----------|
| 1           | 32% WT   | Standard |
| 2           | 16% WT   | Standard |
| 3           | 4% WT    | Standard |
| 4           | 1% WT    | Standard |
| 5           | 0% WT    | Standard |
| 6           | 66       | Heart    |
| 7           | 67       | Heart    |
| 8           | 68       | Heart    |
| 9           | 69       | Heart    |
| 10          | 70       | Heart    |
| 11          | N/A      | N/A      |
| 12          | N/A      | N/A      |
| 13          | N/A      | N/A      |
| 14          | N/A      | N/A      |
| 15          | N/A      | N/A      |

## Gel 56

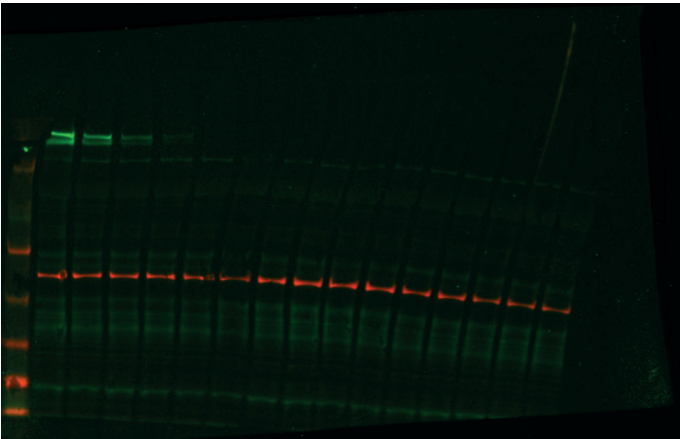

| Lane Number | Mouse ID | Tissue   |
|-------------|----------|----------|
| 1           | 32% WT   | Standard |
| 2           | 16% WT   | Standard |
| 3           | 4% WT    | Standard |
| 4           | 1% WT    | Standard |
| 5           | 0% WT    | Standard |
| 6           | 56       | Heart    |
| 7           | 57       | Heart    |
| 8           | 58       | Heart    |
| 9           | 59       | Heart    |
| 10          | 60       | Heart    |
| 11          | 76       | Heart    |
| 12          | 77       | Heart    |
| 13          | 78       | Heart    |
| 14          | 79       | Heart    |
| 15          | 80       | Heart    |

## Gel 57

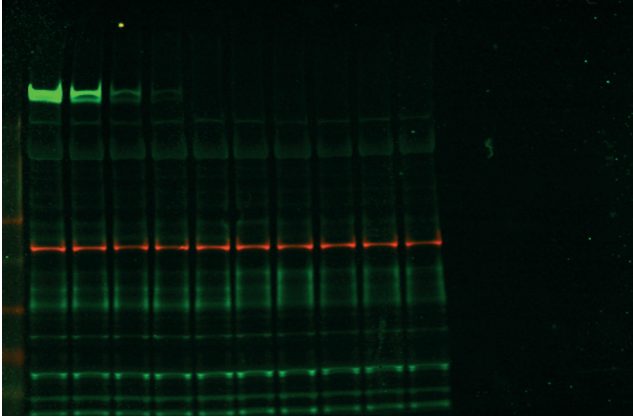

| Lane Number | Mouse ID | Tissue   |
|-------------|----------|----------|
| 1           | 32% WT   | Standard |
| 2           | 16% WT   | Standard |
| 3           | 4% WT    | Standard |
| 4           | 1% WT    | Standard |
| 5           | 0% WT    | Standard |
| 6           | 61       | Heart    |
| 7           | 62       | Heart    |
| 8           | 63       | Heart    |
| 9           | 64       | Heart    |
| 10          | 65       | Heart    |
| 11          | N/A      | N/A      |
| 12          | N/A      | N/A      |
| 13          | N/A      | N/A      |
| 14          | N/A      | N/A      |
| 15          | N/A      | N/A      |

**Figure S1. Fluorescent western blot images and standard curve quantification.** Each gel was run with a standard curve of WT mouse protein diluted into *mdx* mouse protein. Raw fluorescence was measured in the dystrophin and alpha-actinin channels for each standard and unknown sample. (A) Representative western blot. (B) The dystrophin/alpha-actinin ratio was then generated and plotted against the known percent WT protein in each standard to generate an equation. Unknown samples were then interpolated from their dystrophin/alpha-actinin ratio based on the equation of the standard curve. If the raw dystrophin signal of the unknown sample was above the standard curve, the sample was diluted until it fell within the standard curve. (C) Unedited fluorescent western blot images used for dystrophin quantitation. WT, wild type.

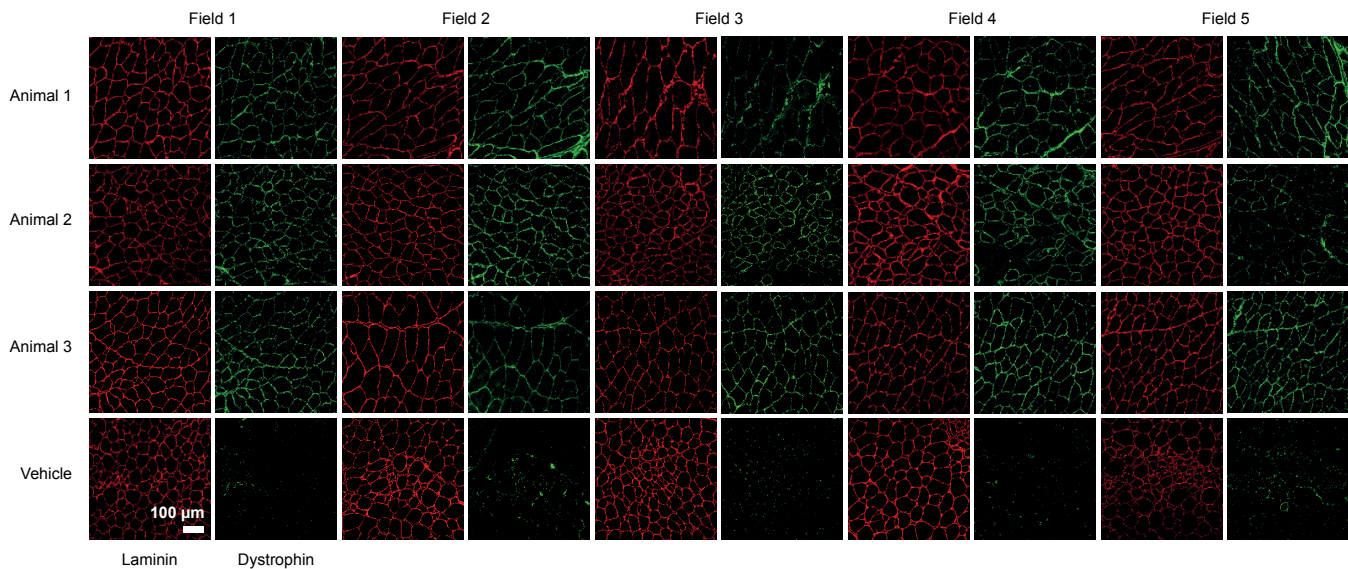

**Figure S2. Immunofluorescent micrographs used to quantify percent positive myofibers in quadriceps of *mdx* mice.** Five-week-old *mdx* mice were injected via tail vein with 30 mg/kg PMO-equivalents of FORCE-M23D. Immunofluorescence images with dystrophin (green) and laminin (red) staining of quadriceps isolated 8 weeks post-dose.

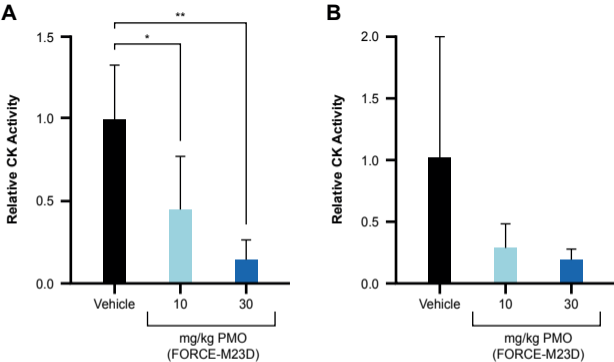

**Figure S3. Treatment with FORCE-M23D reduces serum creatine kinase activity in *mdx* mice.** Five-week-old *mdx* mice injected via tail vein with 10 mg/kg or 30 mg/kg PMO-equivalents of FORCE-M23D were sacrificed and serum CK was assessed 28 (A) or 56 (B) days post-dose. Data are normalized to the mean serum CK of vehicle-treated *mdx* mice at the matched time points. Data represent mean  $\pm$  SD. \*  $p < 0.05$ ; \*\*  $p < 0.01$ . CK, creatine kinase; PMO, phosphorodiamidate morpholino oligomer.

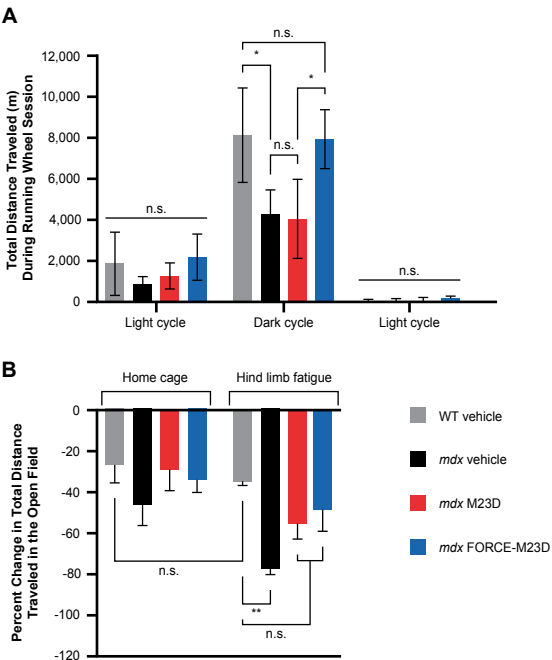

**Figure S4. FORCE-M23D-mediated dystrophin restoration leads to improved functional outcomes in *mdx* mice.** Functional assessments were performed 4 weeks following administration of 5-week-old WT or *mdx* mice with vehicle or *mdx* mice with 30 mg/kg unconjugated M23D or 30 mg/kg PMO-equivalents of FORCE-M23D. (A) Total distance traveled on a running wheel for an uninterrupted 24-h period. (B) Percent change in total distance traveled in an open field before and after hind limb fatigue challenge. Data are expressed as mean  $\pm$  SD. \* $p \leq 0.05$ , \*\* $p \leq 0.01$ . n.s., not significant; PMO, phosphorodiamidate morpholino oligomer; WT, wild type.

| Manuscript Group # | Treatment                          | Tissue Harvest (weeks post dose) | Manuscript Animal ID | Quadriceps |        | Tibialis Anterior |        | Gastrocnemius |        | Diaphragm  |        | Heart      |        |
|--------------------|------------------------------------|----------------------------------|----------------------|------------|--------|-------------------|--------|---------------|--------|------------|--------|------------|--------|
|                    |                                    |                                  |                      | Gel #      | Lane # | Gel #             | Lane # | Gel #         | Lane # | Gel #      | Lane # | Gel #      | Lane # |
| Group 1            | 30 mg/kg PMO-equivalent FORCE-M23D | 0.4 wks                          | 1                    | 1          | 6      | 13                | 6      | 24            | 6      | 35         | 6      | 48         | 6      |
|                    |                                    |                                  | 2                    | 1          | 7      | 13                | 7      | 24            | 7      | 35         | 7      | 48         | 7      |
|                    |                                    |                                  | 3                    | 1          | 8      | 13                | 8      | 24            | 8      | 35         | 8      | 48         | 8      |
|                    |                                    |                                  | 4                    | 1          | 9      | 13                | 9      | 24            | 9      | 35         | 9      | 48         | 9      |
|                    |                                    |                                  | 5                    | 1          | 10     | 13                | 10     | 24            | 10     | 35         | 10     | 48         | 10     |
| Group 2            | 30 mg/kg PMO-equivalent FORCE-M23D | 1 wk                             | 6                    | 7          | 6      | 13                | 11     | 24            | 11     | 35         | 11     | 49         | 11     |
|                    |                                    |                                  | 7                    | 2          | 12     | 13                | 12     | 24            | 12     | 38         | 6      | 49         | 12     |
|                    |                                    |                                  | 8                    | 7          | 7      | 14                | 10     | 24            | 13     | 38         | 7      | 49         | 13     |
|                    |                                    |                                  | 9                    | 7          | 8      | 14                | 11     | 24            | 14     | 38         | 8      | 49         | 14     |
|                    |                                    |                                  | 10                   | 7          | 9      | 14                | 12     | 24            | 15     | 38         | 9      | 49         | 15     |
| Group 3            | 30 mg/kg PMO-equivalent FORCE-M23D | 4 wks                            | 11                   | 3          | 11     | 16                | 6      | 27            | 6      | 37         | 11     | 50         | 11     |
|                    |                                    |                                  | 12                   | 3          | 12     | 16                | 7      | 27            | 7      | 37         | 12     | 50         | 12     |
|                    |                                    |                                  | 13                   | 7          | 10     | 16                | 8      | 27            | 8      | 37         | 13     | 50         | 13     |
|                    |                                    |                                  | 14                   | 7          | 11     | 16                | 9      | 27            | 9      | 37         | 14     | 50         | 14     |
|                    |                                    |                                  | 15                   | 7          | 12     | 16                | 10     | 27            | 10     | 37         | 15     | 50         | 15     |
| Group 4            | 30 mg/kg PMO-equivalent FORCE-M23D | 8 wks                            | 16                   | 4          | 11     | 16                | 11     | 28            | 11     | 40         | 6      | 51         | 6      |
|                    |                                    |                                  | 17                   | 4          | 12     | 16                | 12     | 27            | 11     | 40         | 7      | 51         | 7      |
|                    |                                    |                                  | 18                   | 7          | 13     | 16                | 13     | 25            | 12     | 39         | 8      | 51         | 8      |
|                    |                                    |                                  | 19                   | 7          | 14     | 16                | 14     | 25            | 13     | 40         | 9      | 51         | 9      |
|                    |                                    |                                  | 20                   | 7          | 15     | 16                | 15     | 25            | 14     | 40         | 10     | 51         | 10     |
| Group 5            | 30 mg/kg PMO-equivalent FORCE-M23D | 12 wks                           | 21                   | 5          | 6      | 17                | 6      | 29            | 6      | 41         | 6      | 52         | 6      |
|                    |                                    |                                  | 22                   | 5          | 7      | 17                | 7      | 29            | 7      | 41         | 7      | 52         | 7      |
|                    |                                    |                                  | 23                   | 5          | 8      | 17                | 8      | 29            | 8      | 41         | 8      | 52         | 8      |
|                    |                                    |                                  | 24                   | 5          | 9      | 17                | 9      | 29            | 9      | not tested |        | 52         | 9      |
|                    |                                    |                                  | 25                   | 5          | 10     | 17                | 10     | 29            | 10     | not tested |        | 52         | 10     |
| Group 6            | 30 mg/kg PMO-equivalent FORCE-M23D | 24 wks                           | 26                   | 6          | 6      | 18                | 6      | 30            | 6      | 42         | 6      | 53         | 6      |
|                    |                                    |                                  | 27                   | 6          | 7      | 18                | 7      | 30            | 7      | 42         | 7      | 53         | 7      |
|                    |                                    |                                  | 28                   | 6          | 8      | 18                | 8      | 30            | 8      | 42         | 8      | 53         | 8      |
|                    |                                    |                                  | 29                   | 6          | 9      | 18                | 9      | 30            | 9      | 42         | 9      | 53         | 9      |
|                    |                                    |                                  | 30                   | 6          | 10     | 18                | 10     | 30            | 10     | 42         | 10     | 53         | 10     |
| Group 7            | 10 mg/kg PMO-equivalent FORCE-M23D | 0.4 wks                          | 31                   | 1          | 11     | 12                | 6      | 23            | 6      | 38         | 12     | 47         | 11     |
|                    |                                    |                                  | 32                   | 1          | 12     | 12                | 7      | 23            | 7      | 38         | 13     | 47         | 12     |
|                    |                                    |                                  | 33                   | 1          | 13     | 12                | 8      | 23            | 8      | 38         | 14     | 47         | 13     |
|                    |                                    |                                  | 34                   | 1          | 14     | 12                | 9      | 23            | 9      | 38         | 15     | 47         | 14     |
|                    |                                    |                                  | 35                   | 1          | 15     | 12                | 10     | 23            | 10     | 38         | 16     | 47         | 15     |
| Group 8            | 10 mg/kg PMO-equivalent FORCE-M23D | 1 wk                             | 36                   | 2          | 6      | 12                | 11     | 23            | 11     | 36         | 6      | 49         | 6      |
|                    |                                    |                                  | 37                   | 2          | 7      | 12                | 12     | 23            | 12     | 36         | 7      | 49         | 7      |
|                    |                                    |                                  | 38                   | 2          | 8      | 14                | 6      | 25            | 6      | 36         | 8      | 49         | 8      |
|                    |                                    |                                  | 39                   | 2          | 9      | 14                | 7      | 25            | 7      | 36         | 9      | 49         | 9      |
|                    |                                    |                                  | 40                   | 2          | 10     | 14                | 8      | 25            | 8      | 36         | 10     | 49         | 10     |
| Group 9            | 10 mg/kg PMO-equivalent FORCE-M23D | 4 wks                            | 41                   | 3          | 6      | 15                | 6      | 26            | 6      | 36         | 11     | 50         | 6      |
|                    |                                    |                                  | 42                   | 3          | 7      | 15                | 7      | 26            | 7      | 36         | 12     | 50         | 7      |
|                    |                                    |                                  | 43                   | 3          | 8      | 15                | 8      | 26            | 8      | 36         | 13     | 50         | 8      |
|                    |                                    |                                  | 44                   | 3          | 9      | 15                | 9      | 26            | 9      | 36         | 14     | 50         | 9      |
|                    |                                    |                                  | 45                   | 3          | 10     | not tested        |        | 26            | 10     | 36         | 15     | 50         | 10     |
| Group 10           | 10 mg/kg PMO-equivalent FORCE-M23D | 8 wks                            | 46                   | 4          | 6      | 14                | 13     | 26            | 11     | 39         | 11     | 51         | 46     |
|                    |                                    |                                  | 47                   | 4          | 7      | 14                | 14     | 26            | 12     | 39         | 12     | 51         | 47     |
|                    |                                    |                                  | 48                   | 4          | 8      | 15                | 12     | 25            | 9      | 39         | 13     | 51         | 48     |
|                    |                                    |                                  | 49                   | 4          | 9      | 14                | 9      | 25            | 10     | 38         | 17     | 51         | 49     |
|                    |                                    |                                  | 50                   | 4          | 10     | 14                | 14     | 25            | 11     | 39         | 15     | 51         | 50     |
| Group 11           | Vehicle                            | 4 wks                            | 51                   | 8          | 6      | 19                | 6      | 31            | 6      | 43         | 6      | 54         | 6      |
|                    |                                    |                                  | 52                   | 8          | 7      | 19                | 7      | 31            | 7      | 43         | 7      | 54         | 7      |
|                    |                                    |                                  | 53                   | 8          | 8      | 19                | 8      | 31            | 8      | 43         | 8      | 54         | 8      |
|                    |                                    |                                  | 54                   | 8          | 9      | 19                | 9      | 31            | 9      | 43         | 9      | 54         | 9      |
|                    |                                    |                                  | 55                   | not tested |        | not tested        |        | not tested    |        | not tested |        | not tested |        |
| Group 12           | Vehicle                            | 8 wks                            | 56                   | 8          | 10     | 21                | 6      | 33            | 6      | 45         | 6      | 56         | 6      |
|                    |                                    |                                  | 57                   | 8          | 11     | 21                | 7      | 33            | 7      | 45         | 7      | 56         | 7      |
|                    |                                    |                                  | 58                   | 8          | 12     | 21                | 8      | 33            | 8      | 45         | 8      | 56         | 8      |
|                    |                                    |                                  | 59                   | 8          | 13     | 21                | 9      | 33            | 9      | 45         | 9      | 56         | 9      |
|                    |                                    |                                  | 60                   | 8          | 14     | 21                | 10     | 33            | 10     | 45         | 10     | 56         | 10     |
| Group 13           | Vehicle                            | 12 wks                           | 61                   | 9          | 6      | 22                | 6      | 34            | 6      | 46         | 6      | 57         | 6      |
|                    |                                    |                                  | 62                   | 9          | 7      | 22                | 7      | 34            | 7      | 46         | 7      | 57         | 7      |
|                    |                                    |                                  | 63                   | 9          | 8      | 22                | 8      | 34            | 8      | 46         | 8      | 57         | 8      |
|                    |                                    |                                  | 64                   | 9          | 9      | 22                | 9      | 34            | 9      | 46         | 9      | 57         | 9      |
|                    |                                    |                                  | 65                   | 9          | 10     | 22                | 10     | 34            | 10     | 46         | 10     | 57         | 10     |
| Group 14           | 30 mg/kg Unconjugated M23D         | 1 wk                             | 66                   | 10         | 6      | 20                | 6      | 32            | 6      | 44         | 6      | 55         | 6      |
|                    |                                    |                                  | 67                   | 10         | 7      | 20                | 7      | 32            | 7      | 44         | 7      | 55         | 7      |
|                    |                                    |                                  | 68                   | 10         | 8      | 20                | 8      | 32            | 8      | 44         | 8      | 55         | 8      |
|                    |                                    |                                  | 69                   | 10         | 9      | 20                | 9      | 32            | 9      | 44         | 9      | 55         | 9      |
|                    |                                    |                                  | 70                   | 10         | 10     | 20                | 10     | 32            | 10     | 44         | 10     | 55         | 10     |
| Group 15           | 30 mg/kg Unconjugated M23D         | 4 wks                            | 71                   | 10         | 11     | 19                | 10     | 31            | 10     | 43         | 10     | 54         | 10     |
|                    |                                    |                                  | 72                   | 10         | 12     | 19                | 11     | 31            | 11     | 43         | 11     | 54         | 11     |
|                    |                                    |                                  | 73                   | 10         | 13     | 19                | 12     | 33            | 16     | 43         | 12     | 54         | 12     |
|                    |                                    |                                  | 74                   | 10         | 14     | 19                | 13     | 33            | 17     | 43         | 13     | 54         | 13     |
|                    |                                    |                                  | 75                   | 10         | 15     | 19                | 14     | 31            | 14     | 43         | 14     | 54         | 14     |
| Group 16           | 30 mg/kg Unconjugated M23D         | 8 wks                            | 76                   | 11         | 6      | 21                | 11     | 33            | 11     | 45         | 11     | 56         | 11     |
|                    |                                    |                                  | 77                   | 11         | 7      | 21                | 12     | 33            | 12     | 45         | 12     | 56         | 12     |
|                    |                                    |                                  | 78                   | 11         | 8      | 21                | 13     | 33            | 13     | 45         | 13     | 56         | 13     |
|                    |                                    |                                  | 79                   | 11         | 9      | 21                | 14     | 33            | 14     | 45         | 14     | 56         | 14     |
|                    |                                    |                                  | 80                   | 11         | 10     | 21                | 15     | 33            | 15     | 45         | 15     | 56         | 15     |

Table S1. Reference key for quantitative western blots in Figure S1C.
